# Supplementary material for: A new compound Mn5P4O20H8 achieving efficient heavy metal removal to the ppb level through a dual chemisorption–ion exchange pathway
Source: Royal Society of Chemistry journal article supplement (doi:10.1039/d1en00928a), 2022-01-01
Supplement: d1en00928a1.pdf [file d1en00928a1.pdf]

**A New Compound  $Mn_5P_4O_{20}H_8$  Achieving Efficient Heavy Metals Removal to  
ppb Level through A Dual Chemisorption-ion exchange Pathway**

*Mingxia Deng,<sup>a,b</sup> Weijing Liu,<sup>c</sup> Qian Liu,<sup>\*a</sup> Du Sun,<sup>\*a</sup> and Fuqiang Huang<sup>\*a,b,d</sup>*

*<sup>a</sup> State Key Laboratory of High Performance Ceramics and Superfine Microstructure,  
Shanghai Institute of Ceramics, Chinese Academy of Sciences, Shanghai 200050, P. R.  
China;*

*<sup>b</sup> Center of Materials Science and Optoelectronics Engineering, University of Chinese  
Academy of Sciences, Beijing 100049, China;*

*<sup>c</sup> Jiangsu Provincial Key Laboratory of Environmental Engineering, Jiangsu, China*

*<sup>d</sup> Beijing National Laboratory for Molecular Sciences and State Key Laboratory of Rare  
Earth Materials Chemistry and Applications, College of Chemistry and Molecular  
Engineering, Peking University, Beijing 100871, P. R. China.*

E-mail Address: <mailto:huangfq@mail.sic.ac.cn>(Fuqiang Huang)

<mailto:sundu@mail.sic.ac.cn> (Du Sun)

<mailto:qianliu@mail.sic.ac.cn>(Qian Liu)

<mailto:liuwj@jshb.gov.cn>(Weijing Liu)

<mailto:mingxiadeng@student.sic.ac.cn>(Mingxia Deng)

Table S1. Adsorption equilibrium concentration of different adsorption materials

|                        | Sample                                | Metal ions | C <sub>0</sub>    | C <sub>e</sub>      | References |
|------------------------|---------------------------------------|------------|-------------------|---------------------|------------|
| Metal oxides           | MoS <sub>4</sub> -LDH                 | As(V)      | 16.84 ppm         | 0.31 ppm            | <b>A</b>   |
|                        | MoS <sub>4</sub> -LDH                 | Cr(VI)     | 19.4 ppm          | 0.01 ppm            | <b>A</b>   |
|                        | CoAl-LDH                              | Cr(VI)     | 26.29 ppb         | <b>0.012 ppb</b>    | <b>B</b>   |
|                        | CoAl-LDH                              | Cr(VI)     | 12.36 ppm         | 0.28 ppm            | <b>B</b>   |
|                        | (MgO) <sub>2.9</sub> MnO <sub>2</sub> | Hg(II)     | 1500 ppb          | <b>5 ppb</b>        | <b>C</b>   |
|                        | (MgO) <sub>2.9</sub> MnO <sub>2</sub> | Pb(II)     | 500 ppb           | <b>2 ppb</b>        | <b>C</b>   |
|                        | titanate nanotubes (TNTs)             | Pb(II)     | 621 pm (3mol/L)   | 41 ppm (0.19mol/L)  | <b>D</b>   |
|                        | titanate nanotubes (TNTs)             | Cr(III)    | 156ppm (3mol/L)   | 135 ppm (2.6mol/L)  | <b>D</b>   |
| Carbon-based materials | HOTT-HATN                             | Pb(II)     | 10 ppm            | <b>&lt;0.60 ppm</b> | <b>E</b>   |
| MOF-based materials    | ED-MIL-101                            | Pb(II)     | 414 ppm (2 mol/L) | 384 ppm (1.86mol/L) | <b>F</b>   |
|                        | Zn(hip)(L)·(DMF)(H <sub>2</sub> O)    | Hg(II)     | 20 ppb            | <b>3.05 ppb</b>     | <b>G</b>   |
| Functional polymers    | PVBH                                  | Cu(II)     | 50 ppb            | 18 ppb              | <b>H</b>   |
|                        | PVBH                                  | Cr(III)    | 50 ppb            | <b>0.05 ppb</b>     | <b>H</b>   |
|                        | CoS <sub>2</sub> /GO                  | Hg(II)     | 34 ppb            | <b>2 ppb</b>        | <b>I</b>   |

|                 |                                                               |                |                 |                 |          |
|-----------------|---------------------------------------------------------------|----------------|-----------------|-----------------|----------|
|                 | CoS <sub>2</sub> /GO                                          | Hg(II)         | 102.50 ppm      | 18.84 ppm       | <i>I</i> |
|                 | NFM                                                           | Pb(II)         | ~100 ppb        | <b>1.41 ppb</b> | <i>J</i> |
|                 | NFM                                                           | Pb(II)         | 9.07 ppm        | <b>38 ppb</b>   | <i>J</i> |
| <b>Our work</b> | <b>Mn<sub>5</sub>P<sub>4</sub>O<sub>20</sub>H<sub>8</sub></b> | <b>Pb(II)</b>  | <b>2.31 ppm</b> | <b>1 ppb</b>    |          |
|                 | <b>Mn<sub>5</sub>P<sub>4</sub>O<sub>20</sub>H<sub>8</sub></b> | <b>Cr(III)</b> | <b>4.38 ppm</b> | <b>40 ppb</b>   |          |
|                 | <b>Mn<sub>5</sub>P<sub>4</sub>O<sub>20</sub>H<sub>8</sub></b> | <b>Fe(III)</b> | <b>2.34 ppm</b> | <b>1 ppb</b>    |          |

**Table S2.** Crystallographic Data and Details of the Structure Refinements of  $\text{Mn}_5\text{P}_4\text{O}_{20}\text{H}_8$

| <b>Empirical formula</b>                                        | <b><math>\text{Mn}_5\text{P}_4\text{O}_{20}\text{H}_8</math></b> |
|-----------------------------------------------------------------|------------------------------------------------------------------|
| <b>Formula weight (g/mol)</b>                                   | 726.64                                                           |
| <b>Space group</b>                                              | <i>C2/c</i>                                                      |
| <b>Crystal system</b>                                           | <i>Monoclinic</i>                                                |
| <b>Unit cell</b>                                                | $a = 17.6182(8) \text{ \AA}$                                     |
|                                                                 | $b = 9.1333(4) \text{ \AA}$                                      |
|                                                                 | $c = 9.4921(4) \text{ \AA}$                                      |
| $\beta$                                                         | $96.532(2)^\circ$                                                |
| <b>Volume (<math>\text{\AA}^3</math>)</b>                       | $1517.48(12) \text{ \AA}^3$                                      |
| <b>Z</b>                                                        | 16                                                               |
| <b>F(000)</b>                                                   | 1412                                                             |
| <b><math>\theta</math> range (<math>^\circ</math>)</b>          | 2.3-30.6                                                         |
| <b>Reflections collected</b>                                    | 2328                                                             |
| <b>Independent reflections</b>                                  | 149                                                              |
| <b>Calculated density (<math>\text{g/cm}^3</math>)</b>          | 3.181                                                            |
| <b><math>\mu</math> (<math>\text{mm}^{-1}</math>)</b>           | 4.59                                                             |
| <b>crystal color</b>                                            | Light pink                                                       |
| <b>Goodness-of-fit on <math>F^2</math></b>                      | 1.003                                                            |
| <b><math>R_{\text{int}}</math></b>                              | 0.049                                                            |
| <b><math>R_1</math> for <math>[I &gt; 2\sigma(I)]^a</math></b>  | 0.0214                                                           |
| <b><math>wR_2</math> for <math>[I &gt; 2\sigma(I)]^a</math></b> | 0.0603                                                           |

**a :  $R_1$  ,  $wR_2$  calculation method**

$^a R_1 = \frac{\sum ||F_o| - |F_c||}{\sum |F_o|}$ ,  $wR_2 = [\frac{\sum w(F_o^2 - F_c^2)^2}{\sum wF_o^2}]^{1/2}$ ,  $w = 1/[\sigma^2(F_o^2) + (aP)^2 + bP]$ , where  $F_o$  is the observed structure factor,  $F_c$  is the calculated structure factor,  $\sigma$  is the standard deviation of  $F_c^2$ , and  $P = (F_o^2 + 2F_c^2)/3$ .  $S = [\frac{\sum w(F_o^2 - F_c^2)^2}{(n - p)}]^{1/2}$ , where  $n$  is the number of reflections and  $p$  is the total number of parameters refined.

**Quartz Crystal Microbalance with Dissipation monitoring (QCM-D):**

QCM-D measurements were performed on the commercial Q-Sense Explore

system (Biolin Scientific AB, Sweden). The area of sensor was 0.785 cm<sup>2</sup> (a circle with a diameter of 10 mm). QCM-D can be used to measure the film mass by monitoring changes in frequency and dissipation sensitively of an acoustic resonator. By integrating QCM-D, we can simultaneously measure the real-time mass change of Mn<sub>5</sub>P<sub>4</sub>O<sub>20</sub>H<sub>8</sub> fil. To this end, a titanium gold-coated AT-cut quartz crystal sensor chips was uniformly coated with an adsorbent slurry, 10 mg Mn<sub>5</sub>P<sub>4</sub>O<sub>20</sub>H<sub>8</sub> and 200 μL 20 mg/mL PVDF by adding dropwise and then dried at room temperature. The Mn<sub>5</sub>P<sub>4</sub>O<sub>20</sub>H<sub>8</sub> membrane was first characterized in deionized water at speed of 50 μL/s to establish a baseline for the subsequent mass study. To evaluate the removal process of the new compound for Cr<sup>3+</sup>, 2 mmol/L Cr<sup>3+</sup> aqueous solution was used during the Regime 1 and then 1 mol/L HNO<sub>3</sub> was used during the Regime 2, followed by Cr<sup>3+</sup> aqueous solution for re-adsorption tests.

**Experiments of different ratio:** A series of phosphorylated manganese oxides were prepared by hydrothermal method. Typically, Mn(CH<sub>3</sub>COO)<sub>2</sub> was added to 30 mL ethanol in 50 mL beaker, and then slowly stirred at room temperature. After Mn(CH<sub>3</sub>COO)<sub>2</sub> was dissolved, a certain amount of phosphorus source such as phytic acid and phosphoric acid was added to the above mixture, followed by stirring for 120 min at room temperature. Then the obtained mixture was transferred into a 50 ml Teflon-lined stainless-steel autoclave and subjected to hydrothermal treatment at 150°C for 15h. Finally, the obtained precipitate was centrifuged and then washed with ethanol and deionized water for three times. After the sample was dried under vacuum overnight, A series of phosphorylated manganese oxides was obtained (Figure.S1). The amount of phytic acid were 0.57 mL and 1 mL, and the phosphorus source were phosphoric acid, phytic acid of 50% and 70%. Only 0.57 ml of phytic acid was added, a new compound of Mn<sub>5</sub>P<sub>4</sub>O<sub>20</sub>H<sub>8</sub> was obtained.

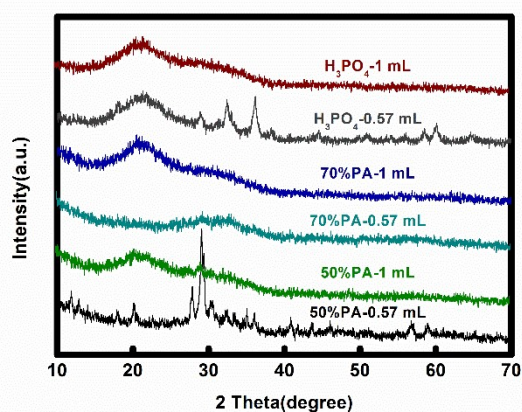

Figure S1. XRD spectrum of different ratio products.

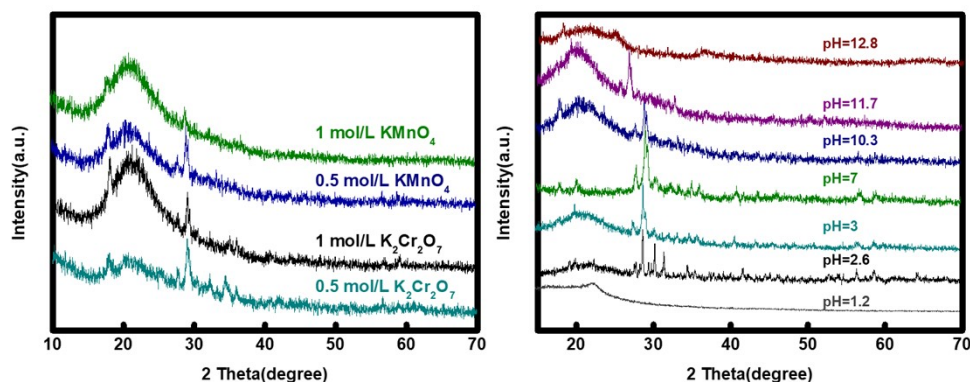

Figure S2. (a) the inoxidizability of  $\text{Mn}_5\text{P}_4\text{O}_{20}\text{H}_8$ ; (b) the acid and base stability of  $\text{Mn}_5\text{P}_4\text{O}_{20}\text{H}_8$  in a wide range of pH values (1.3–12.8)

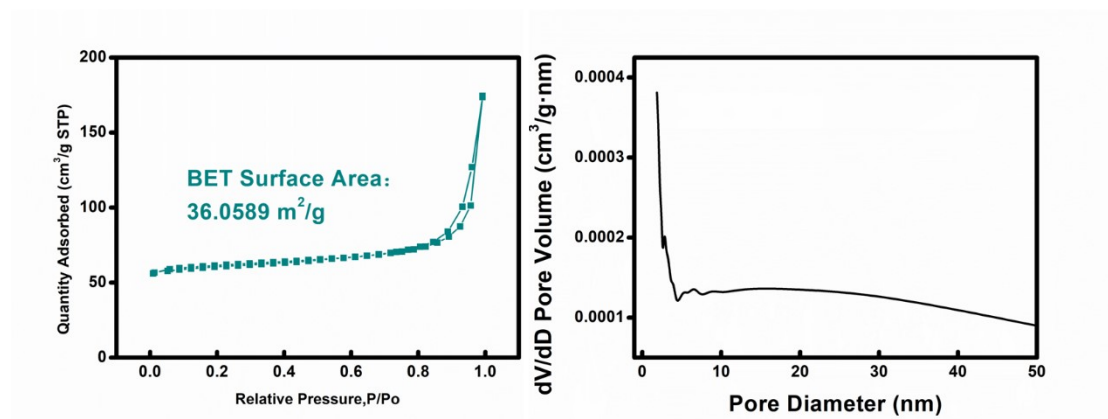

Figure S3. Nitrogen adsorption and desorption curve and pore distribution diagrams of  $\text{Mn}_5\text{P}_4\text{O}_{20}\text{H}_8$ .

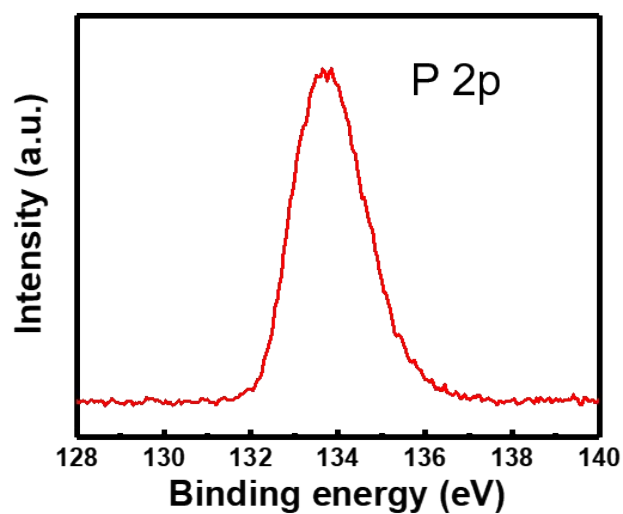

Figure S4. High-resolution XPS spectrum of P 2p.

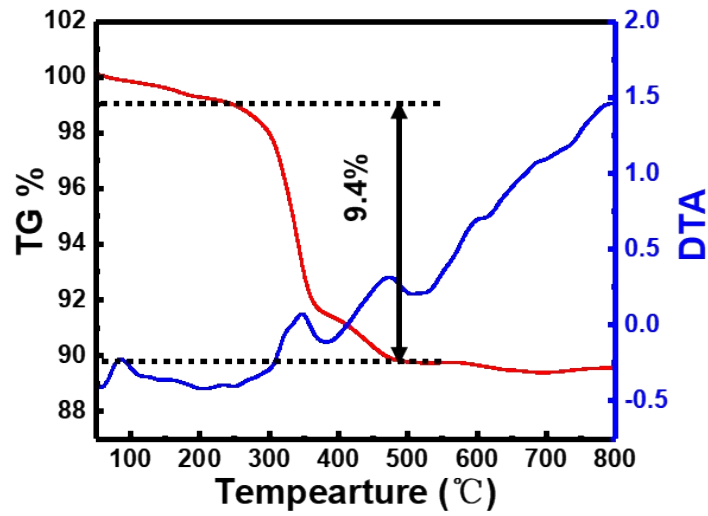

Figure S5. TG curve of  $Mn_5P_4O_{20}H_8$ .

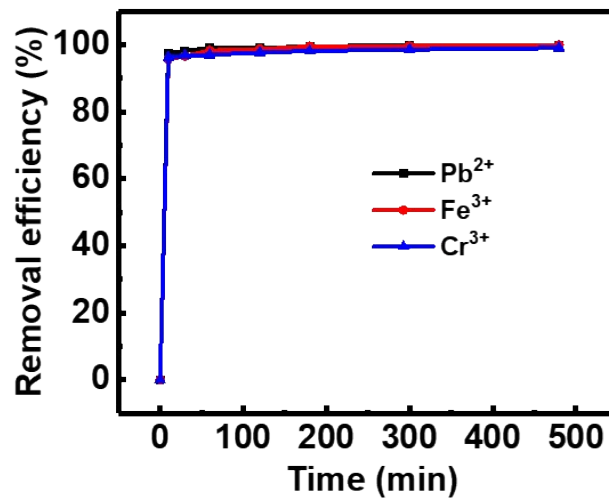

Figure S6. Removal (%) as a function of contact time on  $Mn_5P_4O_{20}H_8$ .

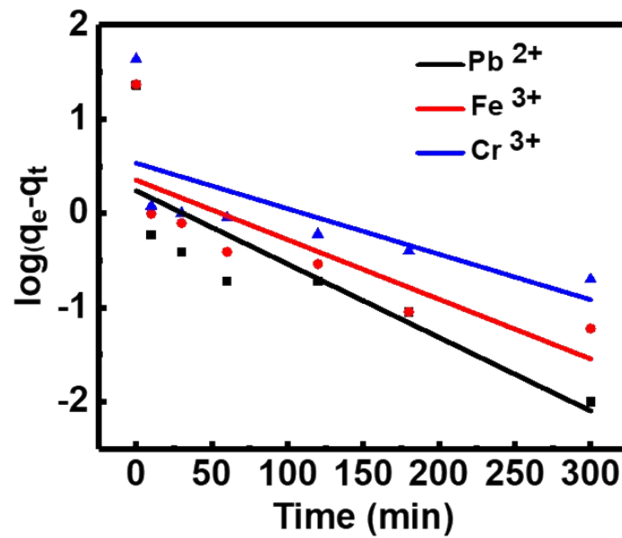

**Figure S7.** Pseudo- first order kinetics plots of  $\text{Mn}_5\text{P}_4\text{O}_{20}\text{H}_8$  towards  $\text{Cr}^{3+}$ ,  $\text{Fe}^{3+}$ , and  $\text{Pb}^{2+}$ .

**Table S3.** Kinetic Parameters for the Adsorption of  $\text{Cr}^{3+}$ ,  $\text{Fe}^{3+}$ , and  $\text{Pb}^{2+}$  on  $\text{Mn}_5\text{P}_4\text{O}_{20}\text{H}_8$ .

|                  | Pseudo-first order model     |                                |                              |        | Pseudo-second order model      |                              |        |
|------------------|------------------------------|--------------------------------|------------------------------|--------|--------------------------------|------------------------------|--------|
|                  | $q_{e,\text{exp}}$<br>(mg/g) | $k_1$<br>( $\text{min}^{-1}$ ) | $q_{e,\text{cal}}$<br>(mg/g) | $R^2$  | $k_2$<br>( $\text{min}^{-1}$ ) | $q_{e,\text{cal}}$<br>(mg/g) | $R^2$  |
| $\text{Cr}^{3+}$ | 43                           | 0.0111                         | 3.47                         | 0.4952 | 0.0199                         | 43.44                        | 0.9998 |
| $\text{Fe}^{3+}$ | 23                           | 0.1528                         | 2.25                         | 0.6521 | 0.0399                         | 23.43                        | 0.9999 |
| $\text{Pb}^{2+}$ | 23                           | 0.1561                         | 1.74                         | 0.7003 | 0.0687                         | 23.11                        | 0.9999 |

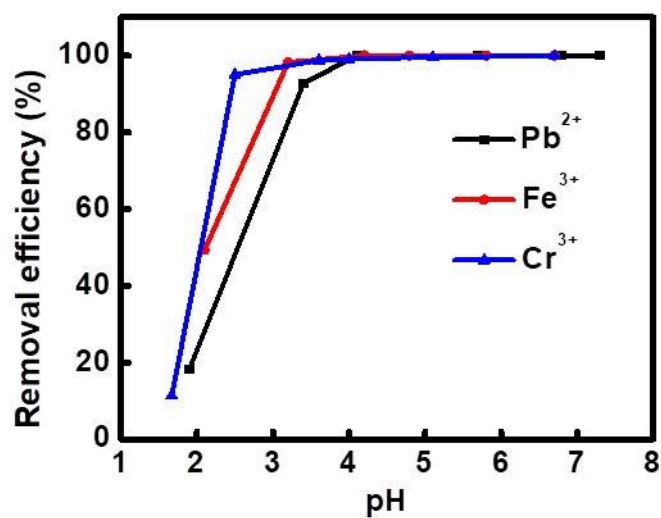

**Figure S8.** Effect of solution pH on the adsorption on  $\text{Mn}_5\text{P}_4\text{O}_{20}\text{H}_8$ .



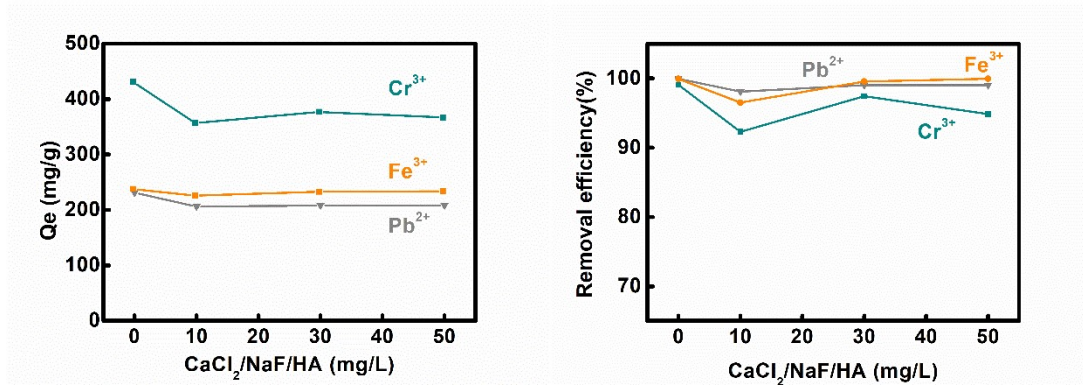

**Figure S9.** Effect of Effects of coexistence of cation, anion and hyaluronic acid on adsorption of heavy metal ions

**Table S4.** Parameters of the Langmuir and Freundlich Isotherm for  $\text{Cr}^{3+}$ ,  $\text{Fe}^{3+}$ , and  $\text{Pb}^{2+}$  Adsorption on  $\text{Mn}_5\text{P}_4\text{O}_{20}\text{H}_8$ .

|                  | Langmuir model    |              |        | Freundlich model                               |   |        |
|------------------|-------------------|--------------|--------|------------------------------------------------|---|--------|
|                  | $q_{\max}$ (mg/g) | $K_L$ (L/mg) | $R^2$  | $K_F$ ( $\text{mg}^{1-n}\text{L}^n/\text{g}$ ) | n | $R^2$  |
| $\text{Cr}^{3+}$ | 201               | 2.97         | 0.9912 | 162                                            | 3 | 0.7551 |
| $\text{Fe}^{3+}$ | 300               | 3.04         | 0.9882 | 197                                            | 2 | 0.9599 |
| $\text{Pb}^{2+}$ | 1510              | 1.59         | 0.9969 | 866                                            | 5 | 0.8991 |

**Table S5.** Selectivity results for  $\text{Mn}_5\text{P}_4\text{O}_{20}\text{H}_8$ . in mixed metal solution

|                                        | $\text{Cr}^{3+}$ | $\text{Fe}^{3+}$ | $\text{Pb}^{2+}$ | $\text{Cu}^{2+}$ | $\text{Ca}^{2+}$ | $\text{Na}^+$ | $\text{Mg}^{2+}$ | $\text{Zn}^{2+}$ |
|----------------------------------------|------------------|------------------|------------------|------------------|------------------|---------------|------------------|------------------|
| <b>Initial Concentration (ppm)</b>     | 5.49             | 5.60             | 6.89             | 5.11             | 5.30             | 5.35          | 5.28             | 5.68             |
| <b>Equilibrium Concentration (ppm)</b> | 0.72             | <0.01            | 0.23             | 0.09             | 5.15             | 5.05          | 4.73             | 5.67             |
| <b>Efficiency (%)</b>                  | 86.88            | 99.82            | 96.66            | 98.24            | 2.83             | 5.61          | 10.50            | 0.18             |

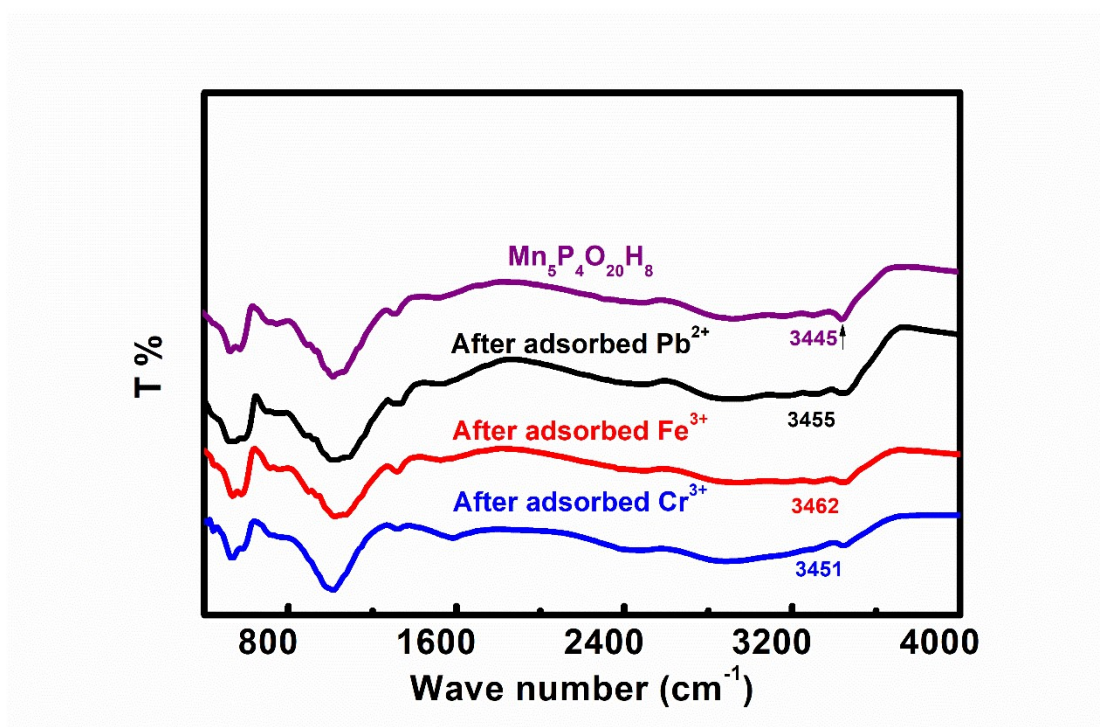

**Figure S10.** The infrared spectroscopy of Mn<sub>5</sub>P<sub>4</sub>O<sub>20</sub>H<sub>8</sub> after adsorption

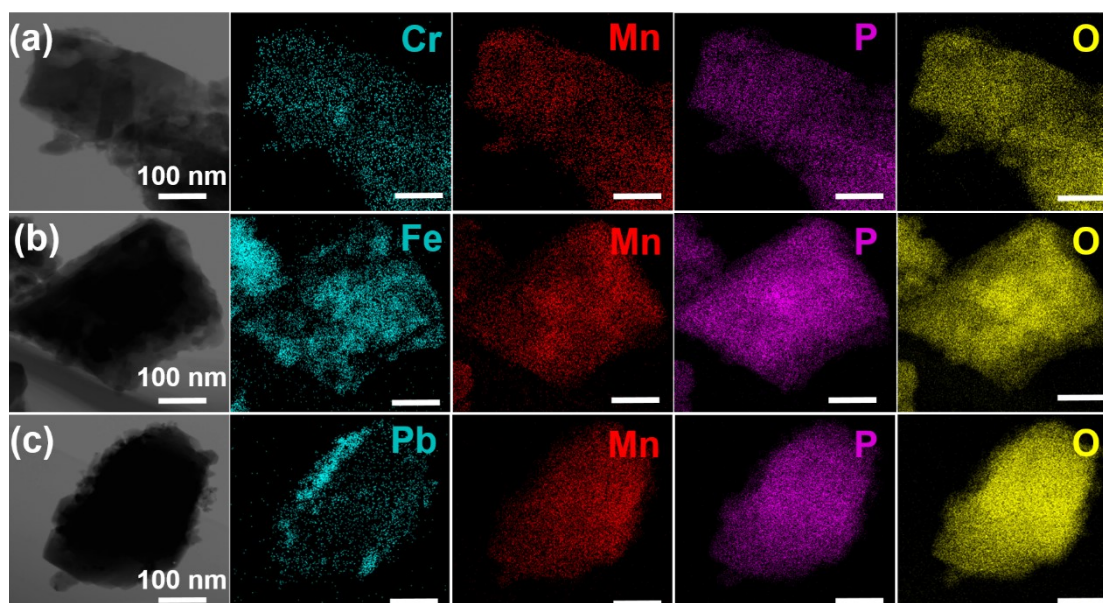

**Figure S11.** EDX elemental mappings (scale bar, 100 nm) of Mn<sub>5</sub>P<sub>4</sub>O<sub>20</sub>H<sub>8</sub> after after adsorption of (a)Cr<sup>3+</sup>, (b) Fe<sup>3+</sup>, and (c) Pb<sup>2+</sup>.

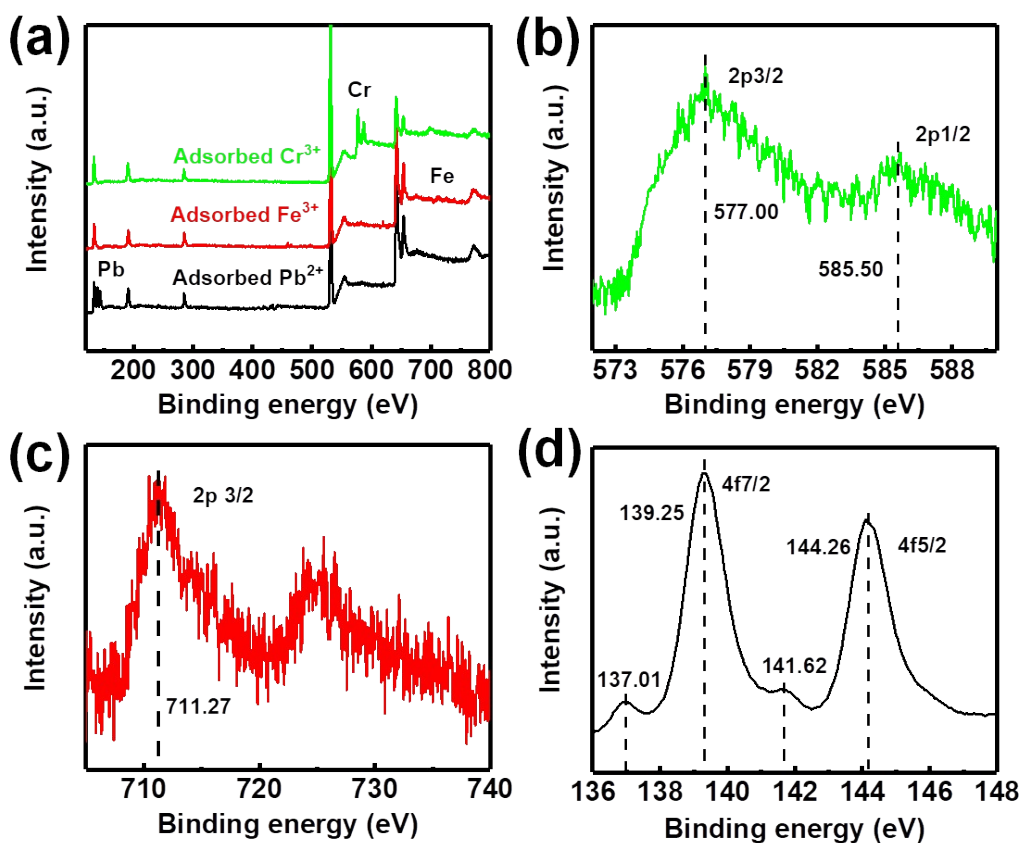

**Figure S12.** (a) Full XPS spectra of  $\text{Mn}_5\text{P}_4\text{O}_{20}\text{H}_8$  after adsorbed heavy metal ions; (b), (c) and (d) High-resolution XPS spectra of Cr  $2p$ , Fe  $2p$ , and Pb  $4f$  from  $\text{Mn}_5\text{P}_4\text{O}_{20}\text{H}_8$  after adsorbed heavy metal ions, respectively

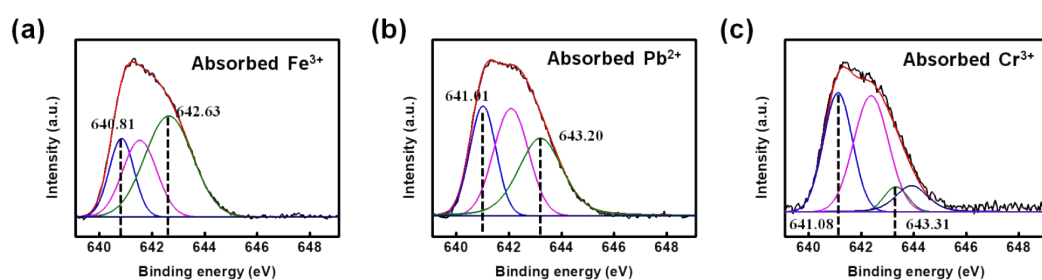

**Figure S13.** (a), (b) and (c) High-resolution XPS spectra of Mn  $2p_{3/2}$  peaks from  $\text{Mn}_5\text{P}_4\text{O}_{20}\text{H}_8$  after adsorbed  $\text{Fe}^{3+}$ ,  $\text{Pb}^{2+}$  and  $\text{Cr}^{3+}$ , respectively

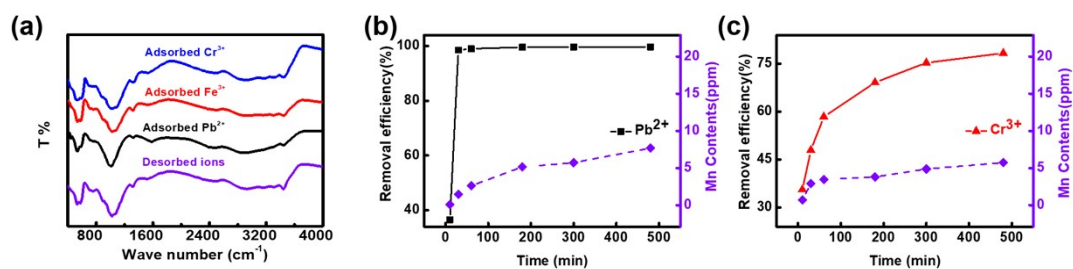

**Figure S14.** (a) The XRD patterns of  $Mn_5P_4O_{20}H_8$  after heavy metal ions adsorption and desorption; (b) and (c) Removal efficiencies of heavy metal ions and Mn ion concentrations in the solution after adsorbed  $Pb^{2+}$  and  $Cr^{3+}$ , respectively

**Table S6. Control experiments of components**

|                                        | Phytic acid | Manganese acetate | Physical mix of phytic acid and manganese acetate |
|----------------------------------------|-------------|-------------------|---------------------------------------------------|
| <b>Initial Concentration (ppm)</b>     | 18.1        | 18.1              | 23.3                                              |
| <b>Equilibrium Concentration (ppm)</b> | 15.5        | 17.7              | 21.7                                              |
| <b>Efficiency (%)</b>                  | 14.3%       | 2.2%              | 6.8%                                              |

**Table.S7 the relationship between pH of the solution after heavy metal adsorption and the concentration of Mn(II) and Pb(II)**

|              | Pb Concentration (ppm) | Mn Concentration (ppm) | Removal (%) |
|--------------|------------------------|------------------------|-------------|
| <b>pH5.6</b> | <b>0.2</b>             | <b>17.1</b>            |             |
| <b>pH6.4</b> | <b>0.3</b>             | <b>15.7</b>            | <b>8.2</b>  |

|                      |            |             |             |
|----------------------|------------|-------------|-------------|
| <b>pH7.2</b>         | <b>0.8</b> | <b>6.2</b>  | <b>63.7</b> |
| <b>pH8.1(20 min)</b> | <b>0.4</b> | <b>0.9</b>  | <b>94.7</b> |
| <b>pH8.1(2 h)</b>    | <b>0.2</b> | <b>0.03</b> | <b>99.8</b> |

---

## References

- A** Ma, L., Islam, S. M., Liu, H., Zhao, J., Sun, G., Li, H., Ma, S., & Kanatzidis, M. G. (2017). Selective and Efficient Removal of Toxic Oxoanions of As(III), As(V), and Cr(VI) by Layered Double Hydroxide Intercalated with MoS<sub>4</sub><sup>2-</sup>. *Chemistry of Materials*, 29(7), 3274–3284.
- B** Rathore, E., Maji, K., & Biswas, K. (2021). Nature-Inspired Coral-like Layered [Co<sub>0.79</sub>Al<sub>0.21</sub>(OH)<sub>2</sub>(CO<sub>3</sub>)<sub>0.11</sub>]·mH<sub>2</sub>O for Fast Selective ppb Level Capture of Cr(VI) from Contaminated Water. *Inorganic Chemistry*, 2021,60(13), 10056–10063.
- C** P. Askari, A. Faraji, G. Khayatian, S. Mohebbi, Effective ultrasound-assisted removal of heavy metal ions As(III), Hg(II), and Pb(II) from aqueous solution by new MgO/CuO and MgO/MnO<sub>2</sub> nanocomposites, *J. Iran. Chem. Soc*, 2017, 14(3):613-621.
- D** W. Liu, T. Wang, A.G.L. Borthwick, Y.Q. Wang, X.C. Yin, X.Z. Li, J.R. Ni, Adsorption of Pb<sup>2+</sup>, Cd<sup>2+</sup>, Cu<sup>2+</sup> and Cr<sup>3+</sup> onto titanate nanotubes: Competition and effect of inorganic ions, *Science of the Total Environment* 456 (2013) 171-180.
- E** R. Xiao, John M. Tobin, M.Q. Zha, Y.L. Hou, J. He, F. Vilela, Z.T. Xu, A nanoporous graphene analog for superfast heavy metal removal and continuous-flow visible-light photoredox catalysis, *J. Mater. Chem. A* 5 (2017) 20180- 20187.
- F** X.B. Luo, L. Ding, J.M. Luo, Adsorptive Removal of Pb(II) Ions from Aqueous Samples with Amino-Functionalization of Metal–Organic Frameworks MIL-101(Cr), *J. Chem. Eng. Data* 60 (2015) 1732-1743
- G** Luo, F., Chen, J. L., Dang, L. L., Zhou, W. N., Lin, H. L., Li, J. Q., Liu, S. J., & Luo, M. B. (2015). High-performance Hg<sup>2+</sup> removal from ultra-low-concentration aqueous solution using both acylamide- and hydroxyl-functionalized metal–organic framework. *Journal of Materials Chemistry A*, 3(18), 9616–9620.
- H** Amoyaw, P. A., Williams, M., & Bu, X. R. (2009). The fast removal of low concentration of cadmium(II) from aqueous media by chelating polymers with salicylaldehyde units. *Journal of Hazardous Materials*, 170(1), 22–26.
- I** Wang, Y., Bao, S., Liu, Y., Yu, Y., Yang, W., Xu, S., & Li, H. (2021). CoS<sub>2</sub>/GO nanocomposites for highly efficient and ppb level adsorption of Hg(II) from wastewater. *Journal of Molecular Liquids*, 2021,322, 114899.
- J** Wei, J., Jiao, X., Wang, T., & Chen, D. (2018). Fast, simultaneous metal reduction/deposition on electrospun a-WO<sub>3</sub>/PAN nanofiber membranes and their potential applications for water purification and noble metal recovery. *Journal of Materials Chemistry A*, 6(30), 14577–14586.
